# Supplementary material
Source: HighWire-hosted journal article supplement (https://bjo.bmj.com/content/102/9/1298)
Supplement: inline-supplementary-material-1 [file inline-supplementary-material-1.pdf]

**Surveillance of Corneal Perforation in Rheumatoid Arthritis Patients**  
**Initial Questionnaire**  
**In association with British Ophthalmic Surveillance Unit**

Thank you for completing this questionnaire for the study of rheumatoid arthritis patients with corneal perforation from peripheral ulcerative keratopathy or corneal melt, in association with the British Ophthalmic Surveillance Unit.

**PATIENT DETAILS**

- 1 Patient's hospital number \_ \_ \_ \_ \_
- 2 First half of patient's postcode \_ \_ \_ \_
- 3 Month \_ \_ and year \_ \_ of Birth
- 4 Patient's Gender: ☐ Male ☐ Female
- 5 Patient's Race:
- White:** ☐ British ☐ Irish ☐ Other \_\_\_\_\_
- Black/Black British:** ☐ Caribbean ☐ African ☐ Other \_\_\_\_\_
- Asian /Asian British:** ☐ Indian ☐ Pakistani ☐ Bangladeshi ☐ Other \_\_\_\_\_
- Chinese:** ☐ Chinese ☐ Other \_\_\_\_\_
- Mixed:** ☐ White & Black Caribbean ☐ White & Asian ☐ White & Black African  
☐ Other \_\_\_\_\_
- Other:** ☐ Other \_\_\_\_\_

**PRESENTING DETAILS & PAST OPHTHALMIC HISTORY**

- 6 Date corneal perforation first identified? \_\_\_\_\_
- 7 Best corrected Snellen visual acuity on date perforation identified?  
\_\_\_\_\_ Right eye \_\_\_\_\_ Left eye
- 8 What ocular comorbidity does the patient have? **Right eye** **Left eye**
- |                                    |                          |                          |
|------------------------------------|--------------------------|--------------------------|
| Cataract                           | <input type="checkbox"/> | <input type="checkbox"/> |
| Age related macular degeneration   | <input type="checkbox"/> | <input type="checkbox"/> |
| Retinal Detachment                 | <input type="checkbox"/> | <input type="checkbox"/> |
| Diabetic retinopathy / maculopathy | <input type="checkbox"/> | <input type="checkbox"/> |
| Glaucoma                           | <input type="checkbox"/> | <input type="checkbox"/> |
| Other (please specify) _____       | <input type="checkbox"/> | <input type="checkbox"/> |
| _____                              | <input type="checkbox"/> | <input type="checkbox"/> |
- 9 Which eye perforated? ☐ Right ☐ Left

- 10 What was the maximum diameter of the corneal perforation at diagnosis?  
☐ <1 mm      ☐ 1-3mm      ☐ >3mm
- 11 Where was the corneal perforation?    ☐ central      ☐ peripheral
- 12 If peripheral, what size was the corneal thinning in clock hours?  
 Right eye \_\_\_\_\_ Left eye \_\_\_\_\_
- 13 What were the blood results at the time of diagnosis?  
 ESR (or Plasma Viscosity)    ☐ normal      ☐ high      ☐ not tested  
 CRP                                      ☐ normal      ☐ high      ☐ not tested

#### PAST MEDICAL HISTORY

- 14 What are the patients known relevant systemic diseases?  
☐ Cardiovascular disease  
☐ Diabetes  
☐ None  
☐ Other (please specify) \_\_\_\_\_

#### CURRENT MEDICATION

- 15 What were the **current** systemic medications at the time of perforation?  
☐ Oral steroid  
☐ IV Steroid  
☐ Immunosuppressants  
☐ Biologics (eg. anti TNF  $\alpha$ , Retuximab)  
☐ Antibiotics  
☐ None  
☐ Other (please specify) \_\_\_\_\_
- 16 What were the **current** topical medications in the perforated eye at the time of perforation?  
☐ Steroids  
☐ Lubricants  
☐ Acetylcysteine  
☐ Antibiotics  
☐ None  
☐ Other (please specify) \_\_\_\_\_

#### INITIAL MANAGEMENT OF CORNEAL PERFORATION

- 17 What were the systemic medications within the first 2 weeks **after** the perforation was identified?    ☐ Oral steroid

- ☐ Intravenous Steroid
- ☐ Immunosuppressants
- ☐ Biologics (eg. anti TNF  $\alpha$ , Retuximab)
- ☐ Antibiotics
- ☐ None
- ☐ Other (please specify) \_\_\_\_\_
- 18 What were the topical medications in the perforated eye within the first 2 weeks **after** the perforation was identified?
- ☐ Steroids
- ☐ Lubricants
- ☐ Acetylcysteine
- ☐ Antibiotics
- ☐ None
- ☐ Other (please specify) \_\_\_\_\_
- 19 Which procedures were performed within the first 2 weeks? And how many times?
- ☐ Bandage Contact Lens \_\_\_\_\_ times
- ☐ Cyanoacrylate Glue \_\_\_\_\_ times
- ☐ Fibrin Glue \_\_\_\_\_ times
- ☐ Amniotic Membrane Graft \_\_\_\_\_ times
- ☐ Conjunctival Flap \_\_\_\_\_ times
- ☐ Corneal graft \_\_\_\_\_ times
- ☐ None \_\_\_\_\_ times
- ☐ Other (please specify) \_\_\_\_\_ times  
\_\_\_\_\_ times
- 20 Was this patient referred to you from another ophthalmology unit? ☐ Yes ☐ No  
If yes, please name the unit \_\_\_\_\_
- 21 Did you refer this patient on to another ophthalmology unit? ☐ Yes ☐ No  
If yes, please name the unit \_\_\_\_\_

Thank you very much for completing this form. Please return it in the pre-paid addressed envelope enclosed to Dr Hannah Timlin, Princess Alexandra Eye Pavilion, Chalmers Street, Edinburgh, EH3 9HA.
