# Supplementary material
Source: HighWire-hosted journal article supplement (https://bjo.bmj.com/content/102/9/1298)
Supplement: inline-supplementary-material-2 [file inline-supplementary-material-2.pdf]

**Surveillance of Corneal Perforation in Rheumatoid Arthritis Patients**  
**12 Month Follow- Up Questionnaire**  
 In association with British Ophthalmic Surveillance Unit

Thank you for completing this follow up questionnaire for the study of rheumatoid arthritis patients with corneal perforation from peripheral ulcerative keratopathy or corneal melt, in association with the British Ophthalmic Surveillance Unit.

**PATIENT DETAILS**

- 1 Patient's hospital number \_ \_ \_ \_ \_
- 2 Month \_ \_ and year \_ \_ of Birth
- 3 Date of Perforation \_ \_ / \_ \_ / \_ \_
- 4 Eye Perforated ☐ Left ☐ Right

**12 MONTH EXAMINATION**

- 5 Was the patient still under review at 12 months? ☐ Yes ☐ No

If Yes, please write date of **12 month ophthalmology examination** (first appointment after 12 months from perforation) \_ \_ / \_ \_ / \_ \_

If No, what was the **last ophthalmology examination** date? \_ \_ / \_ \_ / \_ \_

- 6 Is the patient under the care of another ophthalmic unit? ☐ Yes ☐ No

If Yes, please name the unit \_\_\_\_\_

- 7 Best corrected Snellen visual acuity at 12 months (or 'last examination' if not seen after 12 months)?

Right Eye \_\_\_\_\_ Left Eye \_\_\_\_\_

- 8 If the visual acuity is reduced in the perforated eye, what are the causes?

- ☐ Corneal glue
- ☐ Conjunctival flap
- ☐ Corneal scarring
- ☐ Cataract
- ☐ Endophthalmitis
- ☐ Retinal Detachment
- ☐ Evisceration
- ☐ Enucleation
- ☐ Other (please specify) \_\_\_\_\_

9 Is the globe intact? ☐ Yes ☐ No

If yes, how is the integrity of the globe maintained?

- ☐ Corneal scar tissue
- ☐ Cyanoacrylate glue
- ☐ Conjunctival flap
- ☐ Iris plug
- ☐ Tectonic corneal patch graft
- ☐ Penetrating Keratoplasty
- ☐ Other (please specify) \_\_\_\_\_

10 Has the other eye perforated? ☐ Yes ☐ No

If yes, date of perforation diagnosis \_ \_ / \_ \_ / \_ \_

11 Does the other eye have corneal thinning? ☐ Yes ☐ No

12 What topical medication is the patient on at 12 months in the perforated eye?

- ☐ Steroids
- ☐ Lubricants
- ☐ Acetylcysteine
- ☐ Antibiotics
- ☐ None
- ☐ Other (please specify) \_\_\_\_\_

13 What systemic medication has the patient been taking during the 12 months?

|                                                  | Initial medication<br>(within first 2 weeks) | Subsequent medication<br>(after first 2 weeks) | Still taking<br>at 12 months |
|--------------------------------------------------|----------------------------------------------|------------------------------------------------|------------------------------|
| Oral Steroids                                    | <input type="checkbox"/>                     | <input type="checkbox"/>                       | <input type="checkbox"/>     |
| Immunosuppressants                               | <input type="checkbox"/>                     | <input type="checkbox"/>                       | <input type="checkbox"/>     |
| Biologics<br>(eg. anti TNF $\alpha$ , Retuximab) | <input type="checkbox"/>                     | <input type="checkbox"/>                       | <input type="checkbox"/>     |
| None                                             | <input type="checkbox"/>                     | <input type="checkbox"/>                       | <input type="checkbox"/>     |
| Other (please specify)                           |                                              |                                                |                              |
| _____                                            | <input type="checkbox"/>                     | <input type="checkbox"/>                       | <input type="checkbox"/>     |
| _____                                            | <input type="checkbox"/>                     | <input type="checkbox"/>                       | <input type="checkbox"/>     |

- 14 Which procedures were performed on this eye only? Please document number of times performed **after** the first 2 weeks from diagnosis

|                                                  | Previously reported<br>Initial treatment<br>(within first 2 weeks) | Subsequent treatment<br>(after first 2 weeks) |
|--------------------------------------------------|--------------------------------------------------------------------|-----------------------------------------------|
| <input type="checkbox"/> Bandage Contact lens    | x _____                                                            | x _____                                       |
| <input type="checkbox"/> Cyanoacrylate glue      | x _____                                                            | x _____                                       |
| <input type="checkbox"/> Fibrin Glue             | x _____                                                            | x _____                                       |
| <input type="checkbox"/> Amniotic Membrane Graft | x _____                                                            | x _____                                       |
| <input type="checkbox"/> Conjunctival flap       | x _____                                                            | x _____                                       |
| <input type="checkbox"/> Corneal Graft           | x _____                                                            | x _____                                       |
| <input type="checkbox"/> Other (please specify)  |                                                                    |                                               |
| _____                                            | x _____                                                            | x _____                                       |
| _____                                            | x _____                                                            | x _____                                       |

- 15 Is the patient eligible for registration?

- ☐ Yes, sight impaired (partial blindness)  
☐ Yes, severely sight impaired (full blindness)  
☐ No

- 16 Is the patient deceased? ☐ Yes ☐ No

Thank you very much for taking the time to complete this form.
